# Supplementary material for: A HLA-A2-restricted CTL epitope induces anti-tumor effects against human lung cancer in mouse xenograft model
Source: PubMed Central journal article supplement (PMC4808025; doi:10.18632/oncotarget.6400), 2015-11-26
Supplement: oncotarget-07-0671-s001.pdf [file oncotarget-07-0671-s001.pdf]

SUPPLEMENTARY FIGURE

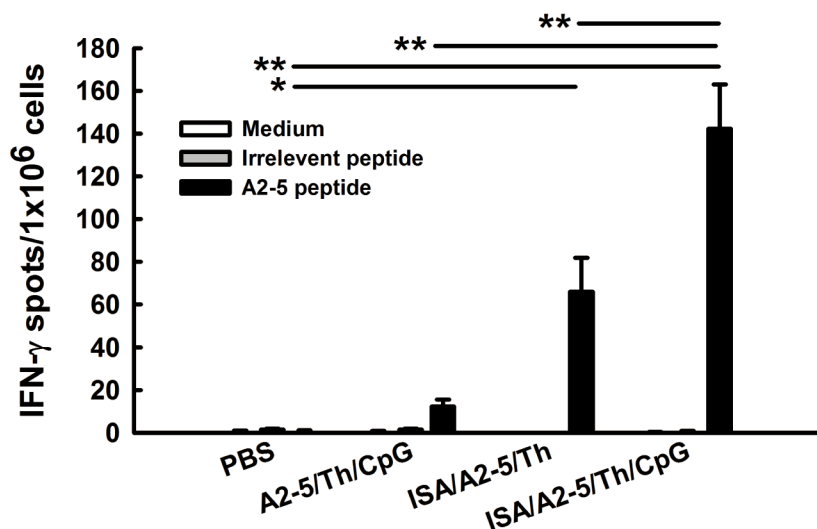

**Supplementary Figure S1: Immunization of ISA/A2-5/Th/CpG elicited high IFN- $\gamma$  secretion cells in HLA-A2 transgenic mice.** HLA-A2 transgenic mice were subcutaneously immunized twice with A2-5 (50  $\mu$ g/mouse) and CpGODN (10  $\mu$ g/mouse)/ISA. Splenocytes were harvested and incubated with various peptides (10  $\mu$ g/ml). Error bars, SD. \* $P < 0.05$ . \*\* $P < 0.01$ .
